# Supplementary material
Source: HighWire-hosted journal article supplement (https://bmjopen.bmj.com/content/7/10/e016977)
Supplement: inline-supplementary-material-1 [file inline-supplementary-material-1.pdf]

**Table Supplementary:** Standardized regression weights from petroleum industry data and nursing data comparing AMOS and MPLUS.

\*indicates items with low regression weights

|                                                                                                      | Industry sample | Nursing sample AMOS | Nursing Sample MPLUS |
|------------------------------------------------------------------------------------------------------|-----------------|---------------------|----------------------|
| <b>Management Commitment</b>                                                                         |                 |                     |                      |
| Managers and supervisors express concern if safety procedures are not followed                       | 0.440           | 0.633               | 0.696                |
| In my workplace managers/supervisors show interest in my safety                                      | 0.520           | 0.689               | 0.727                |
| In my workplace management turn a blind eye to safety issues                                         | 0.737           | 0.618               | 0.712                |
| In my workplace management acts quickly to correct safety problems                                   | 0.811           | 0.743               | 0.806                |
| Corrective action is always taken when management is told about unsafe practice                      | 0.690           | 0.527               | 0.571                |
| Management acts only after incidents have occurred                                                   | 0.500           | 0.666               | 0.710                |
| Management acts decisively when a safety concern is raised                                           | 0.792           | 0.668               | 0.732                |
| <b>Priority of Safety</b>                                                                            |                 |                     |                      |
| Management considers safety to be equally important as getting the work done                         | 0.534           | 0.717               | 0.757                |
| Safety rules and procedures are carefully followed                                                   | 0.585           | 0.592               | 0.670                |
| Management clearly considers the safety of staff of great importance                                 | 0.665           | 0.659               | 0.688                |
| I believe that safety issues are not assigned a high priority                                        | 0.585           | 0.675               | 0.742                |
| <b>Communication</b>                                                                                 |                 |                     |                      |
| There is good communication here about safety issues which affect me                                 | 0.731           | 0.596               | 0.653                |
| Safety information is always brought to my attention by my line manager/supervisor                   | 0.633           | 0.596               | 0.638                |
| I do not receive praise for working safely                                                           | 0.481           | 0.511               | 0.569                |
| My line manager/supervisor does not always inform me of current concern and issues                   | 0.594           | 0.636               | 0.703                |
| Management operates an open door policy on safety issues                                             | 0.541           | 0.511               | 0.574                |
| <b>Safety rules</b>                                                                                  |                 |                     |                      |
| Some safety rules and procedures do not need to be followed to get the job done safely               | 0.724           | 0.600               | 0.580                |
| Some health and safety rules and procedures are not really practical                                 | 0.685           | 0.622               | 0.744                |
| Sometimes it is necessary to depart from safety requirements in order to get the work done           | 0.583           | 0.699               | 0.709                |
| <b>Supportive environment</b>                                                                        |                 |                     |                      |
| I can influence health and safety here                                                               | 0.543           | 0.460               | 0.479                |
| A no blame approach is used to persuade people acting unsafely that their behaviour is inappropriate | 0.367           | 0.150*              | 0.153*               |
| I am strongly encouraged to report unsafe conditions                                                 | 0.639           | 0.692               | 0.756                |
| When people ignore safety procedures here I feel it is none of my business                           | 0.480           | 0.291*              | 0.387*               |
| Co-workers often give tips to each other on how to work safely                                       | 0.323           | 0.452               | 0.498                |
| Employees are not encouraged to raise safety concerns                                                | 0.421           | 0.508               | 0.624                |

**Table Supplementary:** Standardized regression weights from petroleum industry data and nursing data comparing AMOS and MPLUS.

\*indicates items with low regression weights

|                                                                                  | Industry sample | Nursing sample AMOS | Nursing Sample MPLUS |
|----------------------------------------------------------------------------------|-----------------|---------------------|----------------------|
| <b>Personal priorities and need for safety</b>                                   |                 |                     |                      |
| A safe place to work has a lot of personal meaning to me                         | 0.571           | 0.519               | 0.600                |
| It is important to me that there is a continuing emphasis on safety              | 0.655           | 0.560               | 0.625                |
| I understand the safety rules for my job                                         | 0.642           | 0.664               | 0.832                |
| Personally I feel that safety issues are not the most important aspect of my job | 0.500           | 0.571               | 0.694                |
| Safety is the number one priority in my mind when completing a job               | 0.623           | 0.617               | 0.685                |
| <b>Personal appreciation of risk</b>                                             |                 |                     |                      |
| I am clear about what my responsibilities are for health and safety              | 0.273           | 0.561               | 0.744                |
| I am sure it is only a matter of time before I am involved in an incident        | 0.782           | 0.382               | 0.383                |
| In my workplace the chance of being involved in an incident are high             | 0.464           | 0.548               | 0.570                |
| I am rarely worried about being injured on the job                               | 0.286           | 0.110*              | 0.086*               |
| <b>Involvement</b>                                                               |                 |                     |                      |
| I am involved with safety issues at work                                         | 0.687           | 0.657               | 0.602                |
| I am never involved in the ongoing review of safety                              | 0.524           | 0.402               | 0.541                |
| I am involved in informing management of important safety issues                 | 0.724           | 0.671               | 0.677                |
| <b>Work environment</b>                                                          |                 |                     |                      |
| There are always enough people available to get the job done safely              | 0.596           | 0.527               | 0.593                |
| Sometimes I am not given enough time to get the job done safely                  | 0.668           | 0.610               | 0.543                |
| Sometimes conditions here hinder my ability to work safely                       | 0.666           | 0.724               | 0.727                |
| Operational targets often conflict with safety measures                          | 0.795           | 0.590               | 0.662                |
| I cannot always get the equipment I need to do the job safely                    | 0.448           | 0.587               | 0.645                |
| This is a safer place to work than other Trusts I have worked for                | 0.256           | 0.270*              | 0.392*               |
